# Supplementary material for: Risk Factors Associated With Boys’ and Girls’ Developmental Trajectories of Physical Aggression From Early Childhood Through Early Adolescence
Source: PubMed Central journal article supplement (PMC6324348; doi:10.1001/jamanetworkopen.2018.6364), 2018-12-28
Supplement: jamanetwopen-1-e186364-s001.pdf [file jamanetwopen-1-e186364-s001.pdf]

## Supplementary Online Content

Teymoori A, Côté SM, Jones BL, et al. Assessment of risk factors associated with the development of physical aggression in boys and girls from childhood through early adolescence. *JAMA Netw Open*. 2018;1(8):e186364. doi:10.1001/jamanetworkopen.2018.6364

**eTable.** Comparison of the Fit Statistics of Different Multitrajectory Models

This supplementary material has been provided by the authors to give readers additional information about their work.

| <b>eTable.</b> Comparison of the Fit Statistics of Different Multitrajectory Models |                |                  |                |               |                 |               |                  |                |               |                  |  |
|-------------------------------------------------------------------------------------|----------------|------------------|----------------|---------------|-----------------|---------------|------------------|----------------|---------------|------------------|--|
|                                                                                     | Boys           |                  |                |               |                 | Girls         |                  |                |               |                  |  |
|                                                                                     | BIC            | Bayes factor (a) | 2*BIC diff (b) | AIC           | % smaller class | BIC           | Bayes factor (a) | 2*BIC diff (b) | AIC           | % smallest class |  |
| 2-class solution                                                                    | -<br>23441.07  |                  |                | -<br>23390.81 | 26.5            | -<br>8997.31  |                  |                | -<br>8968.21  | 24.3             |  |
| 3-class solution                                                                    | -<br>23219.46  | 0.0000           | 443.22         | -<br>23145.38 | 23.4            | -<br>8822.14  | 0.0000           | 350.34         | -<br>8777.16  | 27.6             |  |
| 4-class solution                                                                    | -<br>23006.42  | 0.0000           | 426.08         | -<br>22916.48 | 18              | -<br>17231.27 | 0.0000           | -<br>16818.26  | -<br>17162.49 | 7.6              |  |
| 5-class solution                                                                    | -<br>23014.93  | 4964.16          | -17.02         | -<br>22909.11 | 6.8             | -<br>17172.35 | 0.0000           | 117.84         | -<br>17095.63 | 11.1             |  |
| 6-class solution                                                                    | No convergence |                  |                |               |                 | -<br>17094.91 | 0.0000           | 154.88         | -<br>16999.67 | 7.1              |  |
|                                                                                     |                |                  |                |               |                 |               |                  |                |               |                  |  |
| a. $\exp( [\text{BIC model N-1 classes}] - [\text{BIC model N classes}] )$          |                |                  |                |               |                 |               |                  |                |               |                  |  |
| b. $2 \times ( [\text{BIC model N classes}] - [\text{BIC model N -1 classes}] )$    |                |                  |                |               |                 |               |                  |                |               |                  |  |
